# Supplementary material for: A Cr3+ luminescence based ratiometric optical laser power meter
Source: Royal Society of Chemistry journal article supplement (doi:10.1039/d2tc02348b), 2022-01-01
Supplement: d2tc02348b1.pdf [file d2tc02348b1.pdf]

Supporting Information

## Cr<sup>3+</sup> luminescence based ratiometric optical laser power meter

L. Marciniak<sup>1\*</sup>, M. Szalkowski<sup>1</sup>, A. Bednarkiewicz<sup>1</sup>, K. Elzbieciak-Piecka<sup>1</sup>

<sup>1</sup>Institute of Low Temperature and Structure Research, Polish Academy of Sciences, Okólna 2, 50-422 Wrocław,  
Poland

\* corresponding author: l.marciniak@intibs.pl

KEYWORDS: luminescence, transition metal ions, light-into-heat conversion, optical density meter, Cr<sup>3+</sup>

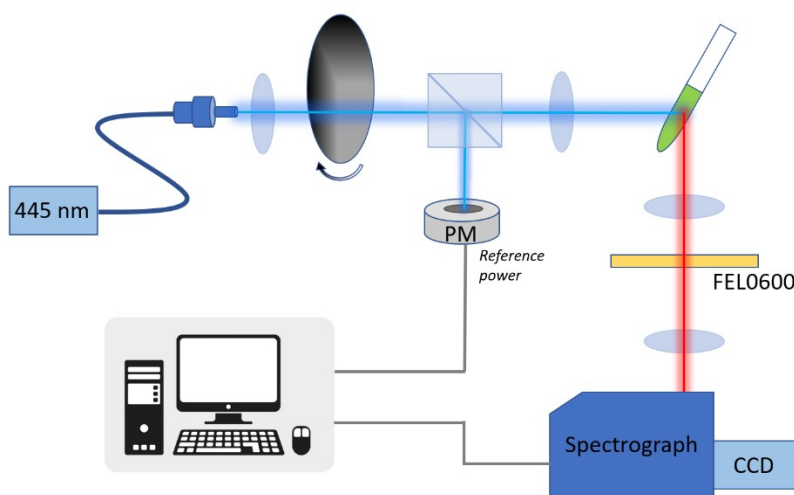

**Figure S1.** Schematic representation of the experimental setup used for emission spectra measurement as a function of excitation density.

Crystal field strength parameter  $Dq/B$  can be determined as follows:

$$Dq = \frac{E(4A_2 \rightarrow 4T_2)}{10} \quad (S1)$$

$$x = \frac{E(4A_2 \rightarrow 4T_1) - E(4A_2 \rightarrow 4T_2)}{Dq} \quad (\text{S2})$$

$$\frac{Dq}{B} = \frac{15(x - 8)}{(x^2 - 10x)} \quad (\text{S3})$$

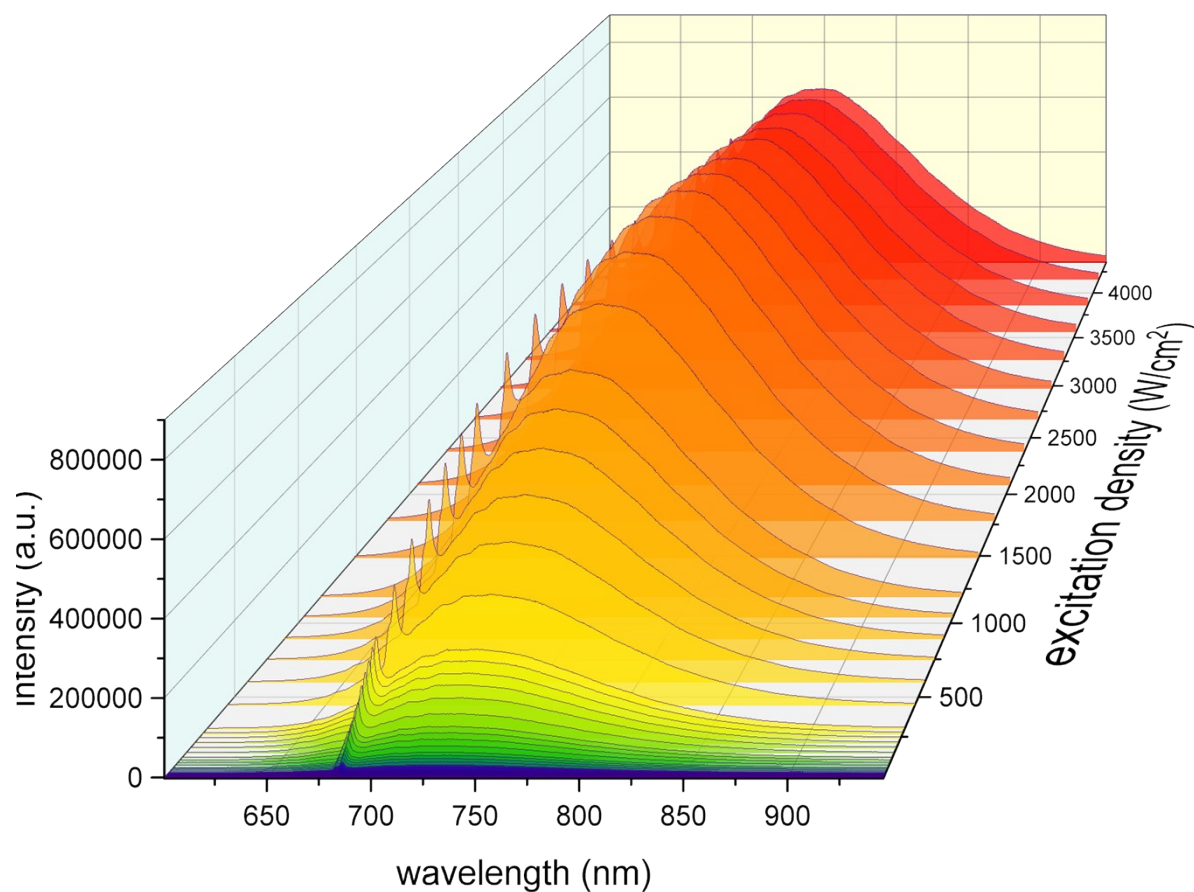

**Figure S2.** Emission spectra of GdAl<sub>3</sub>(BO<sub>3</sub>)<sub>4</sub>:5%Cr<sup>3+</sup> measured as a function of excitation density ( $\lambda_{\text{exc}}=445$  nm).

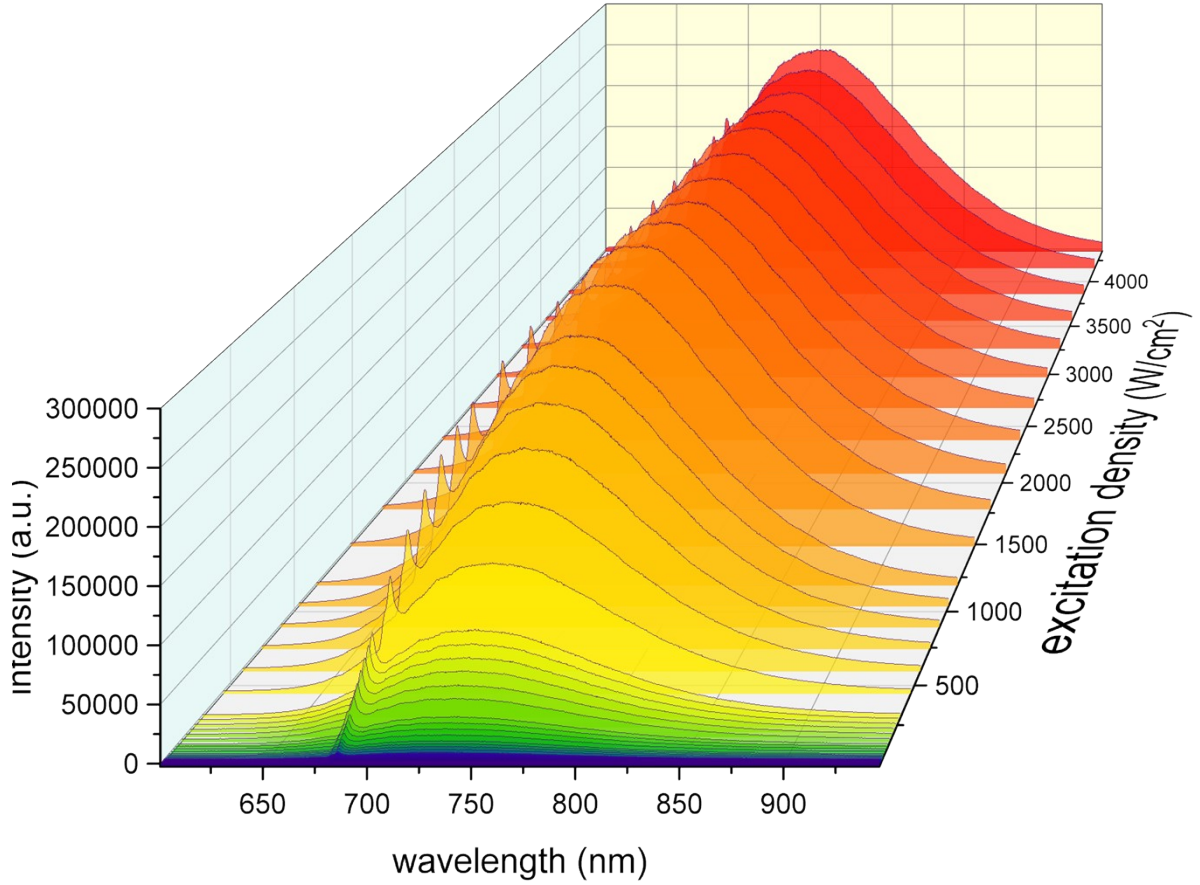

**Figure S3.** Emission spectra of  $\text{GdAl}_3(\text{BO}_3)_4:10\%\text{Cr}^{3+}$  measured as a function of excitation density ( $\lambda_{\text{exc}}=445$  nm).

The nonradiative transition probability can be determined as follows:

$$W_{nr} = 1/\tau_0 - 1/\tau_{exp} \quad (\text{S4})$$

where  $\tau_0$  and  $\tau_{exp}$  represent the radiative and experimental values of lifetime.

In this particular case, we assumed that  $\tau$  achieved for  $0.01\%\text{Cr}^{3+}$  can be used as a  $\tau_0=220 \mu\text{s}$ .

The following values of  $\tau_{avr}$  were achieved  $\tau_{avr}=109 \mu\text{s}$ ,  $\tau_{avr}=65 \mu\text{s}$  and  $\tau_{avr}=26 \mu\text{s}$  for  $1\%\text{Cr}^{3+}$ ,  $5\%\text{Cr}^{3+}$  and  $10\%\text{Cr}^{3+}$ , respectively.

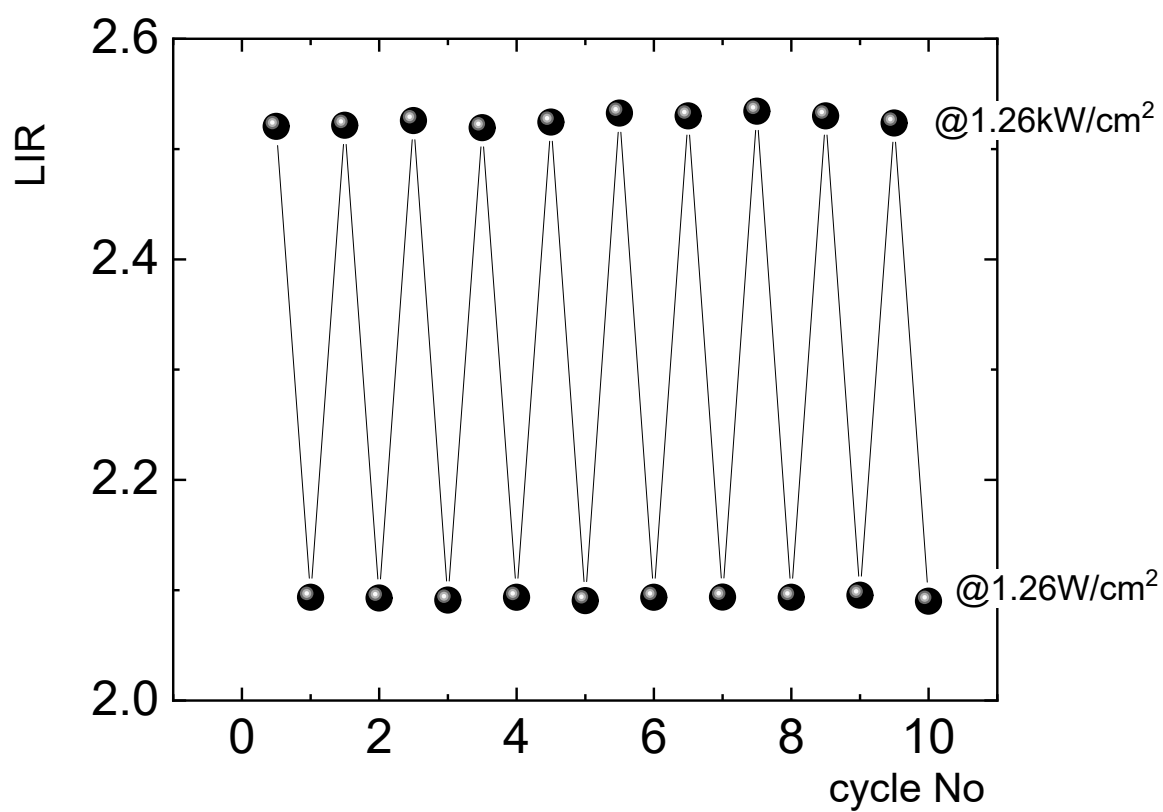

**Figure S4.** The measurement of LIR of  $\text{GdAl}_3(\text{BO}_3)_4:1\%\text{Cr}^{3+}$  measured in a function of low and high excitation densities cycles.

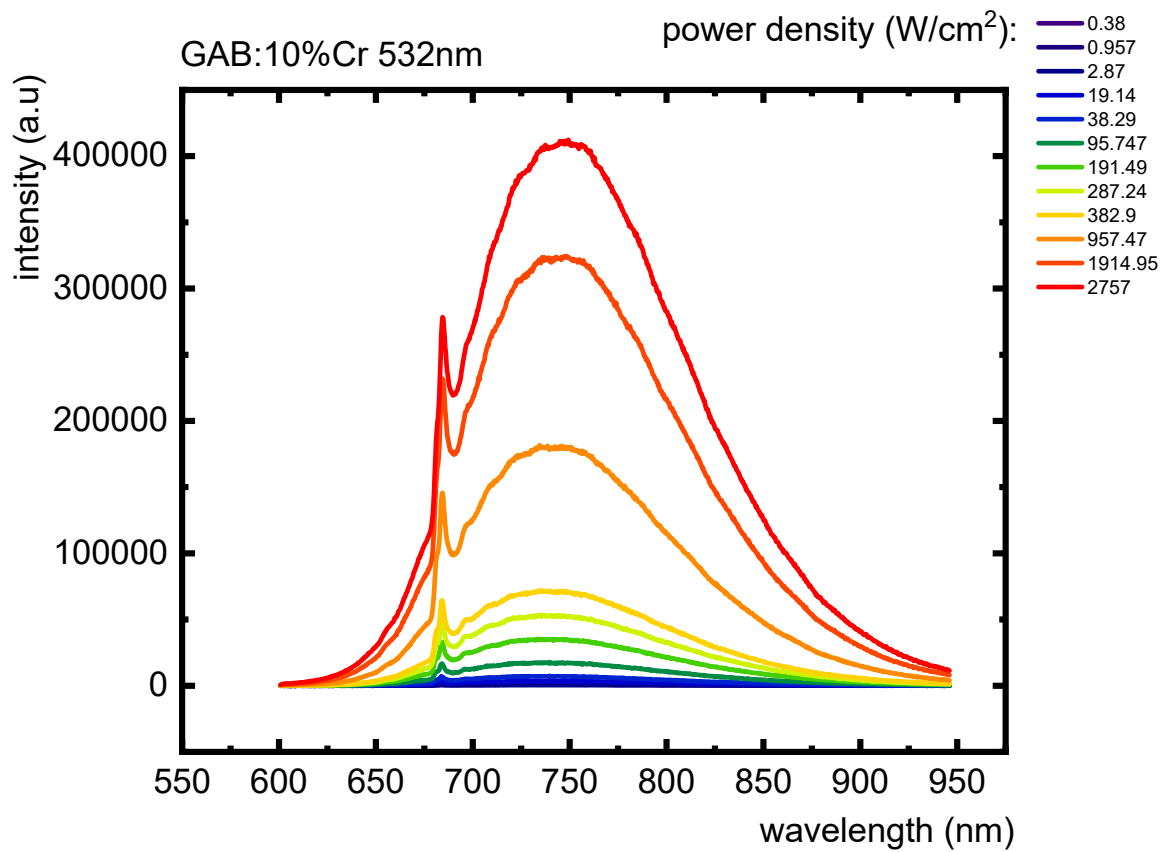

Figure S5. Emission spectra of  $\text{GdAl}_3(\text{BO}_3)_4:1\%\text{Cr}^{3+}$  upon  $\lambda_{\text{exc}}=532$  nm of different excitation densities.
